# Supplementary material for: Pair formation, home range, and spatial variation in density, size and social status in blotched foxface Siganus unimaculatus on an Okinawan coral reef
Source: PeerJ. 2015 Sep 24;3:e1280. doi: 10.7717/peerj.1280 (PMC4586810; doi:10.7717/peerj.1280)
Supplement: Supplemental Information 3 [file peerj-03-1280-s009.xls]

## Sheet: Sheet1
Pair Name	FL small	FL large	FL average	Estimated area(m^2)	log 10 aveFL	log10 Area
A	15	15.5	15.25	431.001	1.18327	2.63448			94.513
B	14	14	14	301.783	1.14613	2.4797			170.096
C	14	15	14.5	472.84	1.16137	2.67471			182.716
D	14	14	14	286.831	1.14613	2.45763			190.809
E	16	16.5	16.25	1038	1.21085	3.0162			264.198
F	16.5	17	16.75	264.198	1.22401	2.42193			276.269
G	13.5	14	13.75	276.269	1.1383	2.44133			286.831
H	12.5	14	13.25	94.513	1.12222	1.97549			301.783
I	10	10.5	10.25	182.716	1.01072	2.26178			431.001
J	16	16	16	170.096	1.20412	2.23069			472.84
K	14.5	15	14.75	190.809	1.16879	2.2806			685.734
L	17	17.5	17.25	685.734	1.23679	2.83616			1038
20 x 20				400
