# Supplementary material for: Pair formation, home range, and spatial variation in density, size and social status in blotched foxface Siganus unimaculatus on an Okinawan coral reef
Source: PeerJ. 2015 Sep 24;3:e1280. doi: 10.7717/peerj.1280 (PMC4586810; doi:10.7717/peerj.1280)
Supplement: Supplemental Information 6 [file peerj-03-1280-s012.xls]

## Sheet: Sheet1
	Observations
Pair	1st	2nd	3rd	4th	5th	6th
A	100	36.4738	0	19.9211	4.6875	2.27808
B	100	5.1987	18.4842	5.69481	17.1315	4.98866
C	100	17.3819	10.5244	28.6001	2.79293	2.91925
D	100	11.5598	0	30.8075	29.1774	2.35405
E	100	103.712	34.5659	6.47816	0.947513	22.1811
F	100	83.3686	21.7215	8.13953	10.2699	14.9851
G	100	34.5362	18.6824	0	3.90563	0
H	100	29.4872	18.6034	16.3005	3.8912	0
I	100	14.3231	1.32845	5.78662	0	0
J	100	42.5515	3.96517	0	3.08323	0
K	100	27.3248	1.73485	8.77895	1.39346	0
L	100	84.7774	2.20317	23.8131	25.8384	3.07941
